# Supplementary material for: A Descriptive-Multivariate Analysis of Community Knowledge, Confidence, and Trust in COVID-19 Clinical Trials among Healthcare Workers in Uganda
Source: MDPI journal article supplement (doi:10.3390/vaccines9030253), 2021-03-12
Supplement: s1 [file s1]

**Supplementary file 3:** Column statistics for normality testing on knowledge, confidence and trust scores

|                                             |        |         |         |
|---------------------------------------------|--------|---------|---------|
| Number of values                            | 260    | 260     | 260     |
| Minimum                                     | 0.0    | 0.2500  | 0.0     |
| 25% Percentile                              | 33.33  | 2.000   | 1.600   |
| Median                                      | 33.33  | 2.500   | 2.000   |
| 75% Percentile                              | 50.00  | 3.000   | 3.000   |
| Maximum                                     | 83.33  | 4.630   | 5.000   |
| Mean                                        | 42.18  | 2.513   | 2.290   |
| Std. Deviation                              | 16.14  | 0.8161  | 0.9676  |
| Std. Error of Mean                          | 1.001  | 0.05061 | 0.06001 |
| Lower 95% CI of mean                        | 40.21  | 2.413   | 2.172   |
| Upper 95% CI of mean                        | 44.15  | 2.613   | 2.408   |
| D'Agostino & Pearson omnibus normality test |        |         |         |
| K2                                          | 3.707  | 0.2245  | 10.25   |
| P value                                     | 0.1567 | 0.8938  | 0.0059  |
| Passed normality test (alpha=0.05)?         | Yes    | Yes     | No      |
| P value summary                             | ns     | ns      | **      |
