# Supplementary material for: A Descriptive-Multivariate Analysis of Community Knowledge, Confidence, and Trust in COVID-19 Clinical Trials among Healthcare Workers in Uganda
Source: MDPI journal article supplement (doi:10.3390/vaccines9030253), 2021-03-12
Supplement: s1 [file s1]

**Supplementary file S2: Identifying potential challenges in COVID-19 clinical trials in Uganda**

| Sn  | Question                                                                                                                                        | Response/catogry        |
|-----|-------------------------------------------------------------------------------------------------------------------------------------------------|-------------------------|
| 1.  | Age                                                                                                                                             |                         |
| 2.  | Sex (Male/Female)                                                                                                                               |                         |
| 3.  | Marital status: Single, Married                                                                                                                 |                         |
| 4.  | Education level: 1=None, 2=Certificate, 3=Diploma, 4=Bachelors, 5=Postgraduate                                                                  |                         |
| 5.  | Occupation: 1=Clinician, 2=Nurse, 3=Pharmacist, 4=Lab personnel, 5=Support staff                                                                |                         |
| 6.  | District in which your health facility is located                                                                                               |                         |
|     | Knowledge questions (correct answer 1, wrong =0 and convert scores out of 100                                                                   |                         |
| 7.  | Beta coronaviruses include the following except: 1=MERS, 2=SARS, 3=Ebola                                                                        | MERS, SARS =1 knowledge |
| 8.  | Do you know any company involved in COVID-19 vaccine/ trials development and research? 1=Yes, 2=No                                              | Yes=1 knowledge         |
| 9.  | Do you think breaking the COVID-19 circle involves vaccines and clinical trials development? 1=Yes, 2=No                                        | Yes=1 knowledge         |
| 10. | Do you have the fear about the COVID-19 vaccine clinical trials? 1= Yes, 2=No                                                                   | Yes=1 knowledge         |
| 11. | Please rank your level of fear of covid19 clinical trials: 0=No fear, 5=Extreme fear                                                            | Fear                    |
| 12. | Rank the level of suspicion about the COVID-19 vaccine clinical trials? 0=No fear, 5= Extremely suspicious                                      | Fear                    |
| 13. | Willingness to participate in COVID-19 vaccine clinical trials. 0=Never, 5=Extremely ready                                                      | Fear                    |
| 14. | Which is the major COVID-19 vaccines type you are comfortable with during clinical trials? 1=LAV, 2=IV, 3=HV, 4=DRV, 5=None                     |                         |
| 15. | Willingness to participate in a rushed COVID-19 vaccine clinical trial. 0=Never, 5= Extremely ready                                             | Fear                    |
| 16. | I have been enlightened on WHO guidelines and stages for COVID-19 vaccine clinical trials                                                       | Confidence              |
| 17. | Have you ever participated in any COVID-19 vaccine clinical trial previously? 1=Yes, 2=No                                                       | Yes=1 knowlege          |
| 18. | Rank the government committed to the development of the genuine COVID-19 vaccine clinical trials? 0=Not committed, 5=Extremely committed        | Confidence              |
| 19. | Confidence in the skills of Ugandans and their ability to handle the COVID-19 vaccine clinical trials: 0=Weak, 5=Extremely high                 | Confidence              |
| 20. | My workmates are committed to COVID-19 control guidelines and upcoming associated clinical trials?0=Weak, 5=Extremely high                      | Confidence              |
| 21. | There are sufficient designated medical personnel handling COVID-19 vaccine clinical trials and cases at my workplace? 0=Weak, 5=Extremely high | Confidence              |
| 22. | I have received adequate communication about the COVID-19 vaccine clinical trials in Uganda? 1=Yes, 2=No                                        | Yes=1 knowledge         |
| 23. | My information about the planned COVID-19 vaccine clinical trials in Uganda is.....                                                             | confidence              |

|     |                                                                                                                                                    |            |
|-----|----------------------------------------------------------------------------------------------------------------------------------------------------|------------|
|     | 0=weak, 5=Sufficient                                                                                                                               |            |
| 24. | Level of trust for the Uganda national regulatory guidelines for covid19 vaccine clinical trials?0=No confidence, 5= Extremely confident           | Fear       |
| 25. | Access to funding in vaccine development may be a challenge for Ugandan covid19 vaccine clinical trials: 1=Not necessarily, 5=Extremely            | Confidence |
| 26. | My level of confidence in herbal and alternative medicine covid19 vaccines clinical trials being promoted in Uganda: 0=None, 5=Extremely confident | Confidence |
| 27. | Name of Health facility/hospital                                                                                                                   |            |
