# Supplementary material for: A Descriptive-Multivariate Analysis of Community Knowledge, Confidence, and Trust in COVID-19 Clinical Trials among Healthcare Workers in Uganda
Source: MDPI journal article supplement (doi:10.3390/vaccines9030253), 2021-03-12
Supplement: s1 [file s1]

Supplement file 1. Distribution of study participants with gender and regions.

| Region  | District  | Gender frequencies |          |           | Region   | District    | Gender frequencies |          |          |
|---------|-----------|--------------------|----------|-----------|----------|-------------|--------------------|----------|----------|
|         |           | Female             | Male     | Total     |          |             | Female             | Male     | Total    |
| Central | Entebbe   | 0(0.0)             | 1(1.0)   | 1(1.0)    | Northern | Alebtong    | 0(0.0)             | 1(4.0)   | 1(4.0)   |
|         | Jinja     | 1(1.0)             | 0(0.0)   | 1(1.0)    |          | Arua        | 2(8.0)             | 2(8.0)   | 4(16.0)  |
|         | Kampala   | 27(26.7)           | 36(35.6) | 63(62.4)  |          | Dokolo      | 0(0.0)             | 1(4.0)   | 1(4.0)   |
|         | Kyotera   | 2(2.0)             | 3(3.0)   | 5(5.0)    |          | Gulu        | 1(4.0)             | 1(4.0)   | 2(8.0)   |
|         | Luwero    | 2(2.0)             | 5(5.0)   | 7(6.9)    |          | Kabong      | 0(0.0)             | 1(4.0)   | 1(4.0)   |
|         | Lwengo    | 0(0.0)             | 1(1.0)   | 1(1.0)    |          | Kotido      | 1(4.0)             | 5(20.0)  | 6(24.0)  |
|         | Masaka    | 0(0.0)             | 1(1.0)   | 1(1.0)    |          | Lira        | 0(0.0)             | 2(8.0)   | 2(8.0)   |
|         | Mityana   | 0(0.0)             | 4(4.0)   | 4(4.0)    |          | Moroto      | 0(0.0)             | 1(4.0)   | 1(4.0)   |
|         | Mubende   | 0(0.0)             | 1(1.0)   | 1(1.0)    |          | Moyo        | 0(0.0)             | 1(4.0)   | 1(4.0)   |
|         | Nakaseke  | 0(0.0)             | 2(2.0)   | 2(2.0)    |          | Nabilatuk   | 0(0.0)             | 2(8.0)   | 2(8.0)   |
|         | Wakiso    | 7(6.9)             | 8(7.9)   | 15(14.9)  |          | Napak       | 0(0.0)             | 1(4.0)   | 1(4.0)   |
|         | Total     | 39(38.6)           | 62(61.4) | 101 (100) |          | Oyam        | 0(0.0)             | 1(4.0)   | 1(4.0)   |
| Eastern | Bukedea   | 1(1.4)             | 0(0.0)   | 1(1.4)    | Western  | Pader       | 0(0.0)             | 1(4.0)   | 1(4.0)   |
|         | Bulambuli | 1(1.4)             | 0(0.0)   | 1(1.4)    |          | Terego      | 0(0.0)             | 1(4.0)   | 1(4.0)   |
|         | Busia     | 0(0.0)             | 4(5.6)   | 4(5.6)    |          | Total       | 4(16.0)            | 21(84.0) | 25(100)  |
|         | Butaleja  | 0(0.0)             | 1(1.4)   | 1(1.4)    |          | Bushenyi    | 13(21.0)           | 21(33.9) | 34(54.8) |
|         | Kumi      | 0(0.0)             | 1(1.4)   | 1(1.4)    |          | Fort Portal | 0(0.0)             | 2(3.2)   | 2(3.2)   |
|         | Manafwa   | 0(0.0)             | 1(1.4)   | 1(1.4)    |          | Ibanda      | 1(1.6)             | 2(3.2)   | 3(4.8)   |
|         | Mbale     | 4(5.6)             | 2(2.8)   | 6(8.3)    |          | Isingiro    | 0(0.0)             | 1(1.6)   | 1(1.6)   |
|         | Serere    | 0(0.0)             | 1(1.4)   | 1(1.4)    |          | Kabale      | 0(0.0)             | 1(1.6)   | 1(1.6)   |
|         | Soroti    | 18(25.0)           | 32(44.4) | 50(69.4)  |          | Kyenjojo    | 0(0.0)             | 1(1.6)   | 1(1.6)   |
|         | Tororo    | 5(6.9)             | 1(1.4)   | 6(8.3)    |          | Lyantonde   | 0(0.0)             | 2(3.2)   | 2(3.2)   |
|         | Total     | 29(40.3)           | 43(59.7) | 72(100)   |          | Masindi     | 0(0.0)             | 1(1.6)   | 1(1.6)   |
|         |           |                    |          |           |          | Mbarara     | 2(3.2)             | 11(17.7) | 13(21.0) |
|         |           |                    |          |           |          | Mitooma     | 1(1.6)             | 0(0.0)   | 1(1.6)   |
|         |           |                    |          |           |          | Ntoroko     | 0(0.0)             | 2(3.2)   | 2(3.2)   |
|         |           |                    |          |           |          | Rukungiri   | 0(0.0)             | 1(1.6)   | 1(1.6)   |
|         |           |                    |          |           |          | Total       | 17(27.4)           | 45(72.6) | 62(100)  |

Study participants arose from 46 districts within Uganda. Generally, there were more males than females who participated in the study demonstrating gender distribution inequalities within a majority of healthcare centers in rural areas of Uganda.
